# Supplementary material for: Fasting regulates mitochondrial function through lncRNA PRKCQ-AS1-mediated IGF2BPs in papillary thyroid carcinoma
Source: Springer Nature journal article supplement (doi:10.1038/s41419-023-06348-0), 2023-12-14

**Figure 1F**

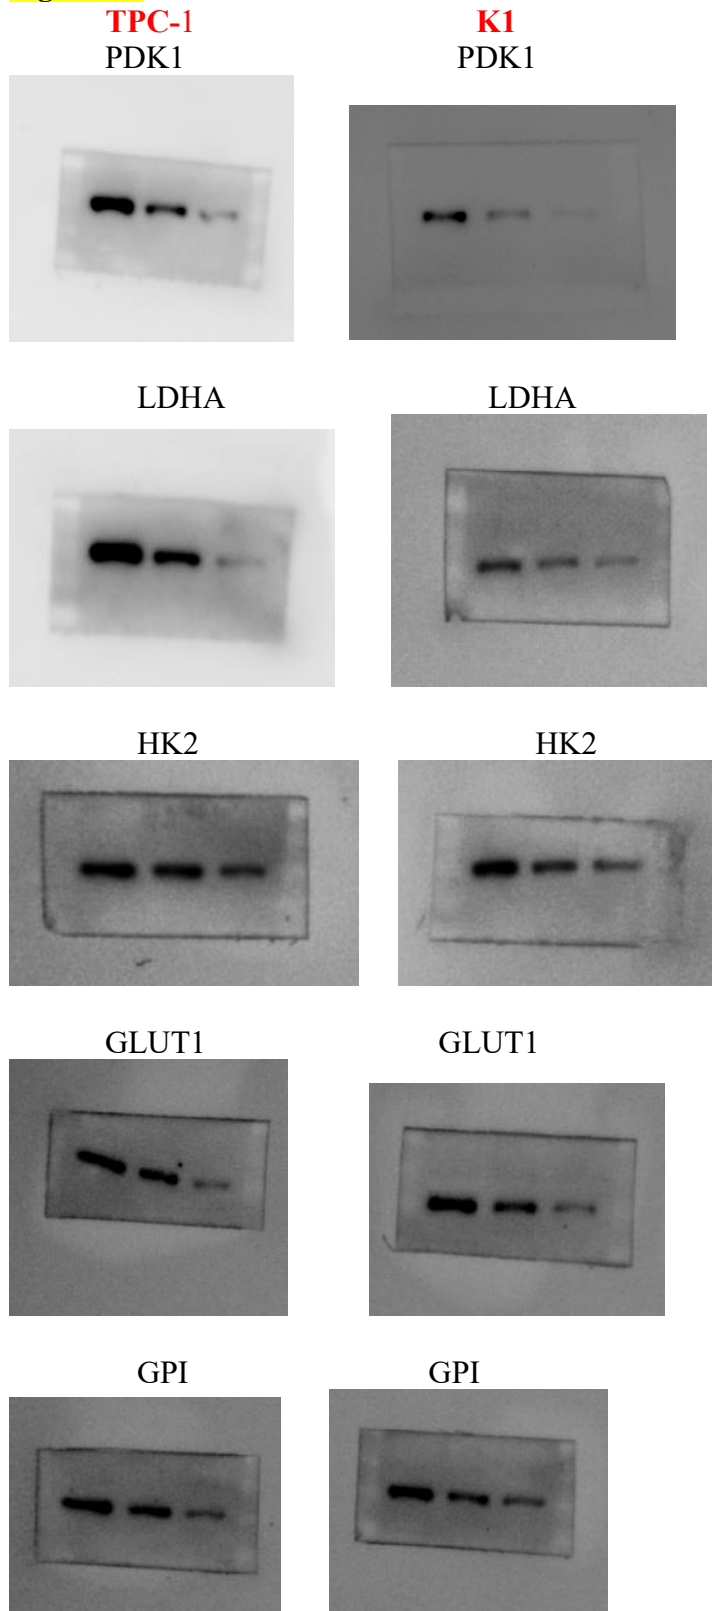

$\beta$ -actin

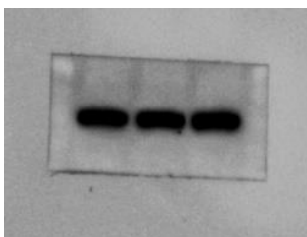

$\beta$ -actin

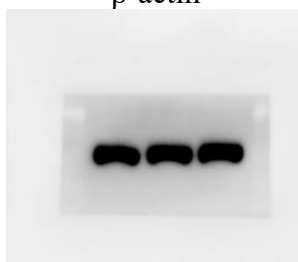

**Figure 1J**

**TPC-1**  
MFN1

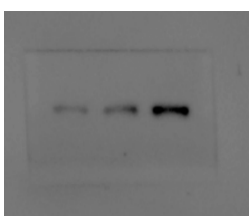

**K1**  
MFN1

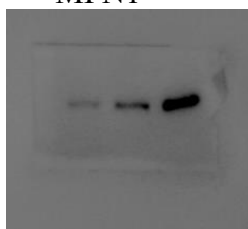

MFN2

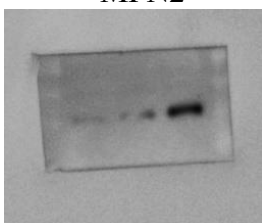

MFN2

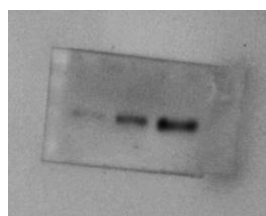

OPA1

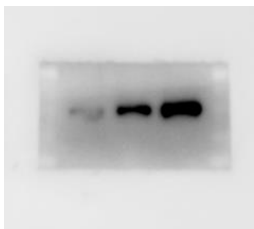

OPA1

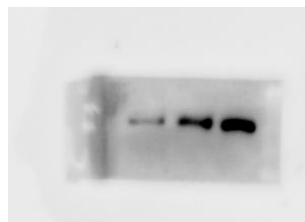

DRP1

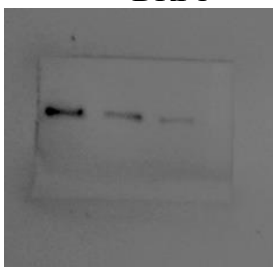

DRP1

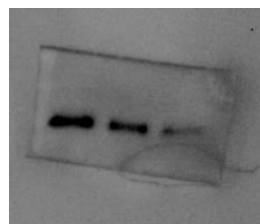

FIS1

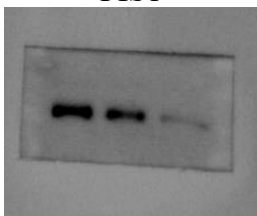

FIS1

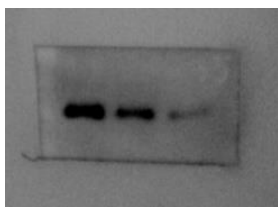

MF1

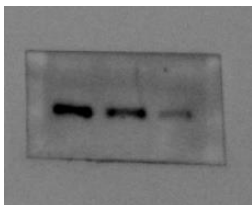

MF1

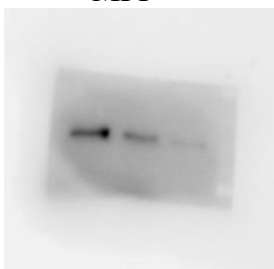

$\beta$ -actin

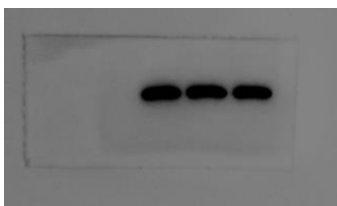

$\beta$ -actin

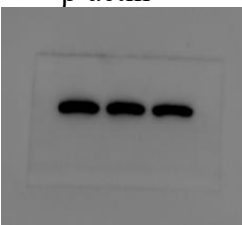

**Figure 4E**

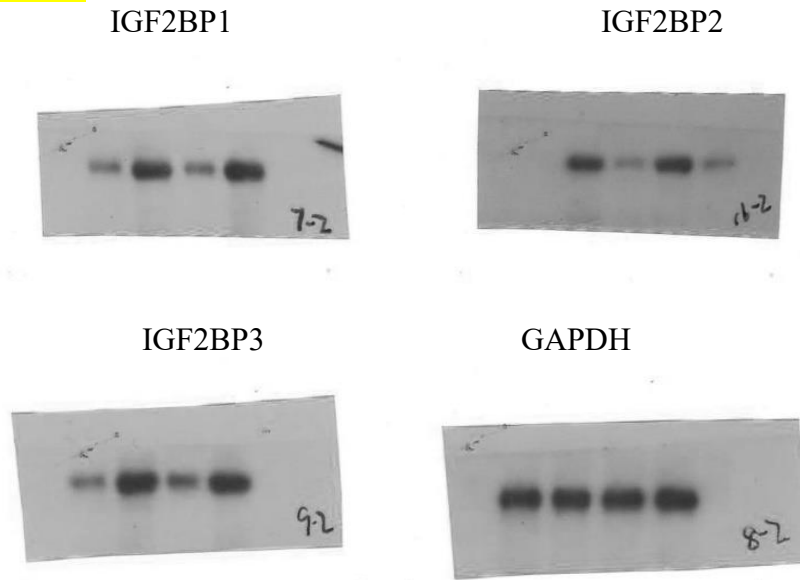

**Figure 4F**

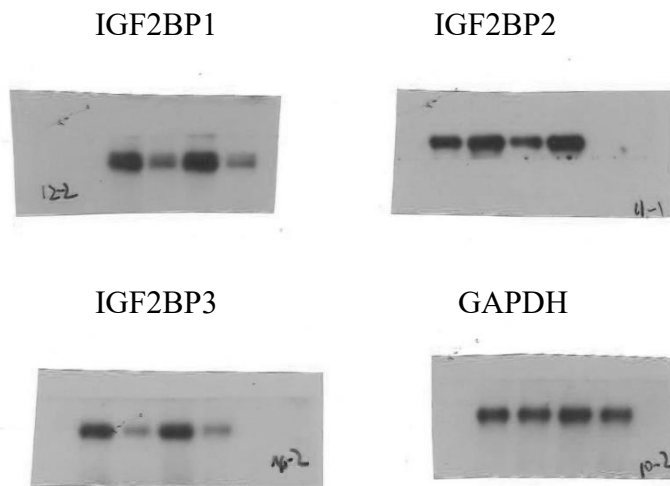

**Figure 4J**

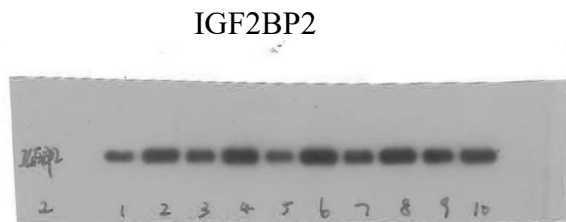

IGF2BP3

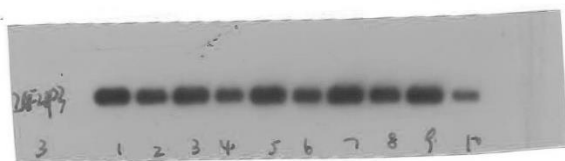

GAPDH

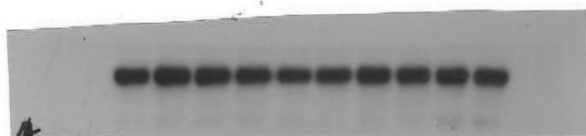

**Figure 5A**

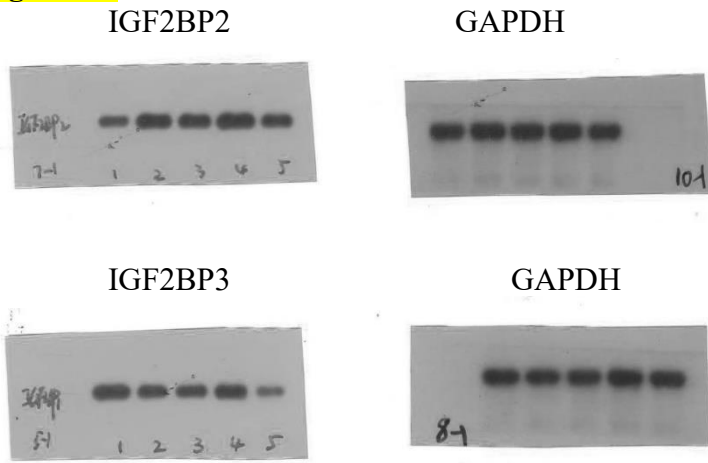

**Figure 5H**

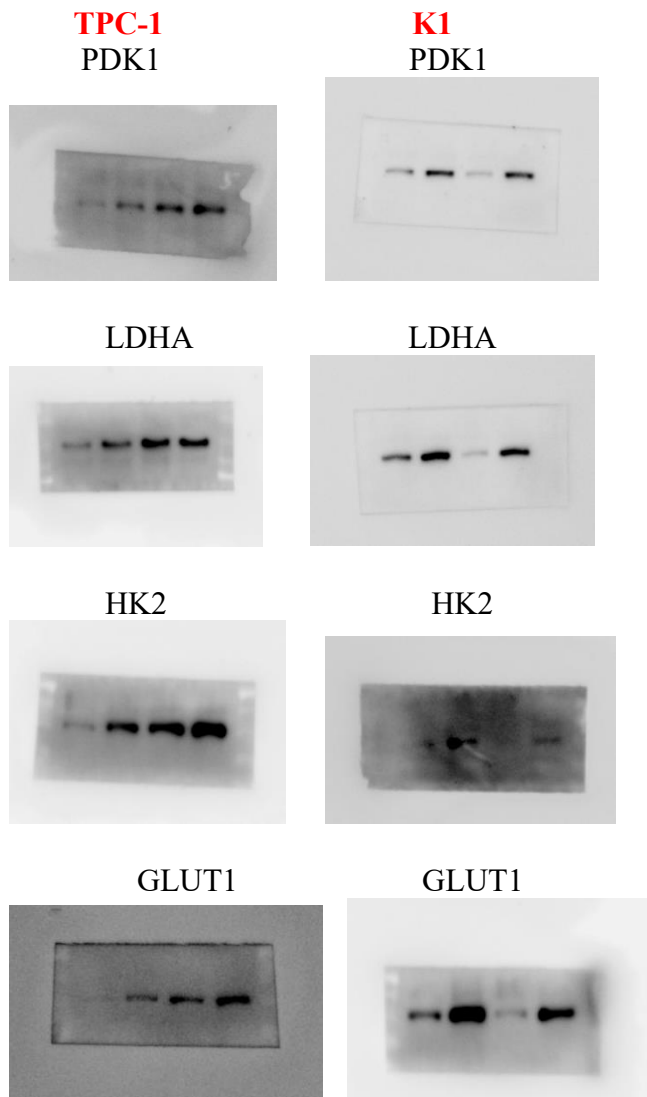

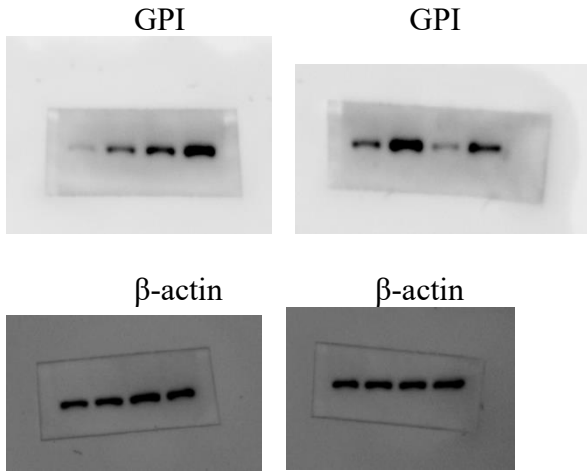

**Figure 5L**

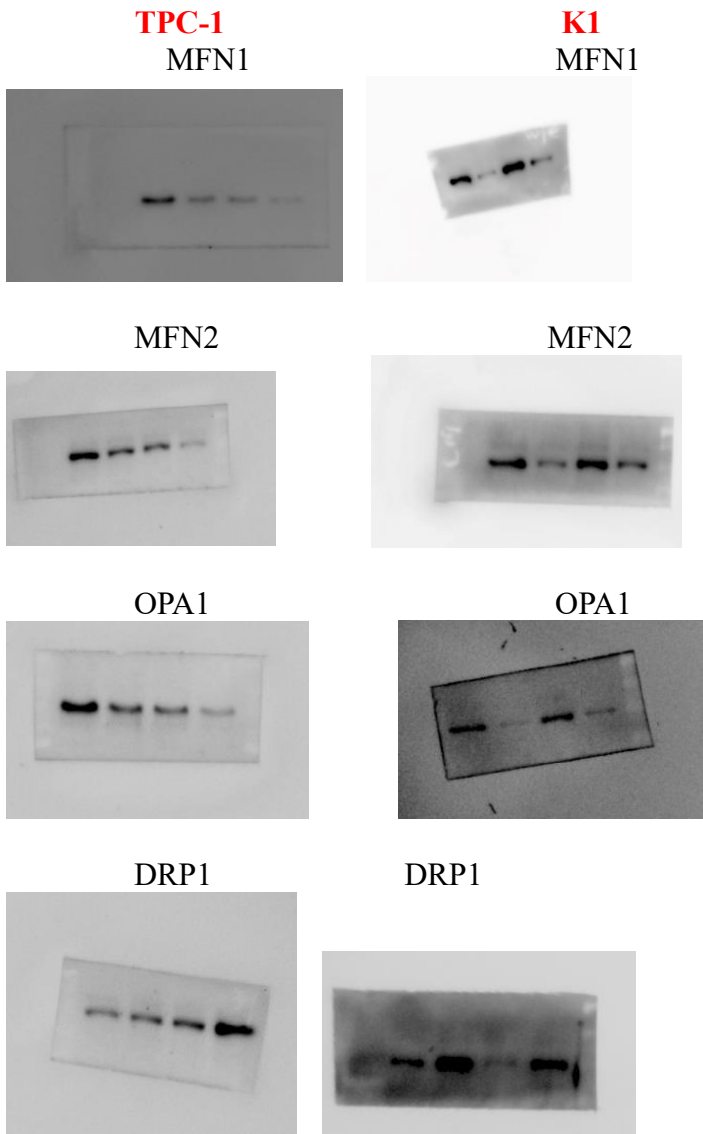

FIS1

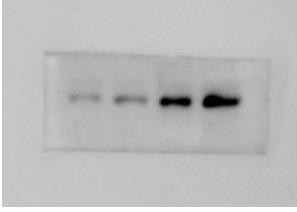

FIS1

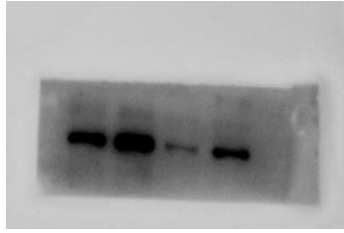

MF1

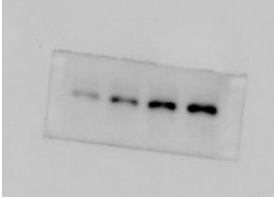

MF1

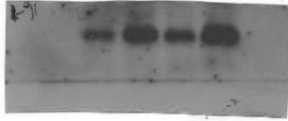

$\beta$ -actin

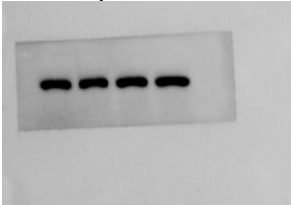

$\beta$ -actin

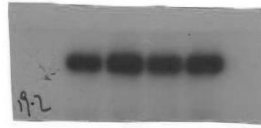

**Figure 6E**

**TPC-1**

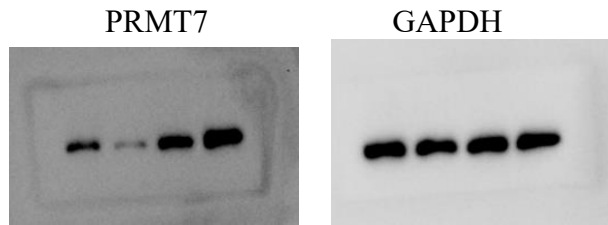

**K1**

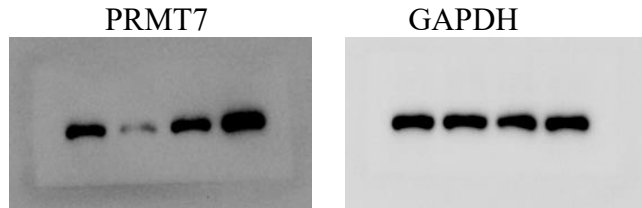

**Figure 6F**

**TPC-1**

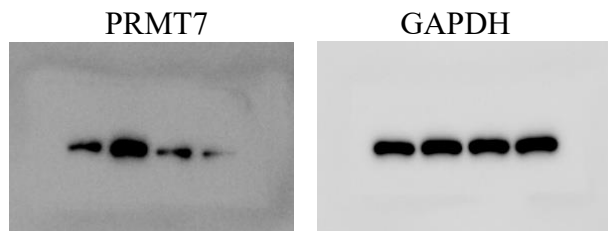

**K1**

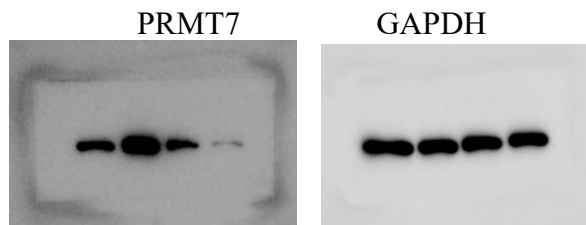

**Figure 6G**

**TPC-1**

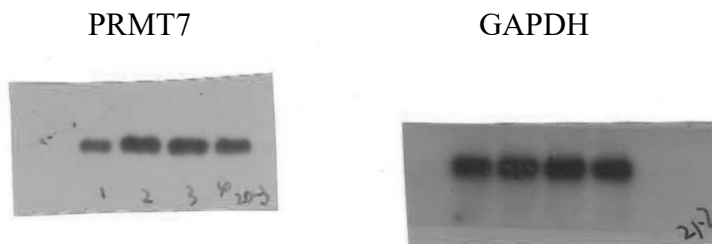

**K1**

PRMT7

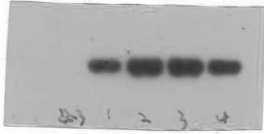

GAPDH

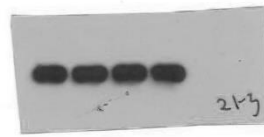

**Figure 6I**

**TPC-1**

PRMT7

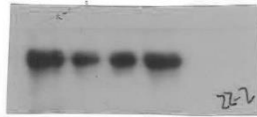

PRMT7

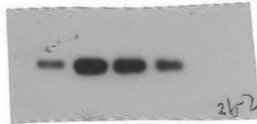

GAPDH

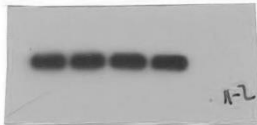

GAPDH

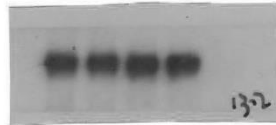

**K1**

PRMT7

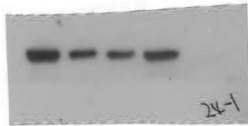

PRMT7

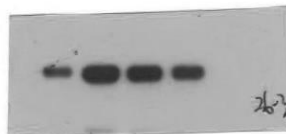

GAPDH

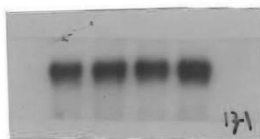

GAPDH

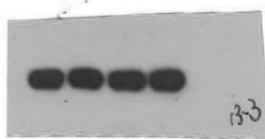

**Figure 6J**

**TPC-1**

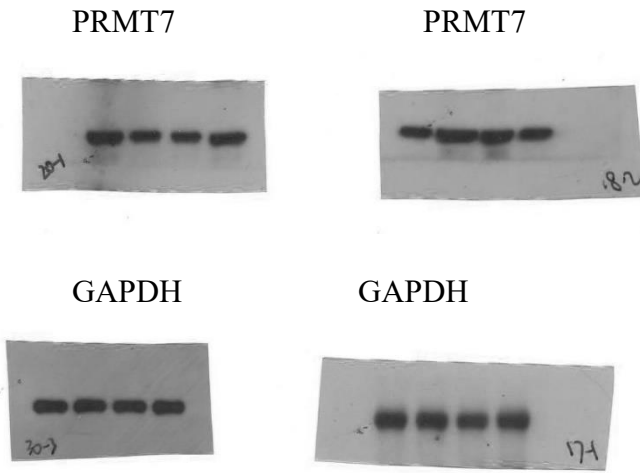

**K1**

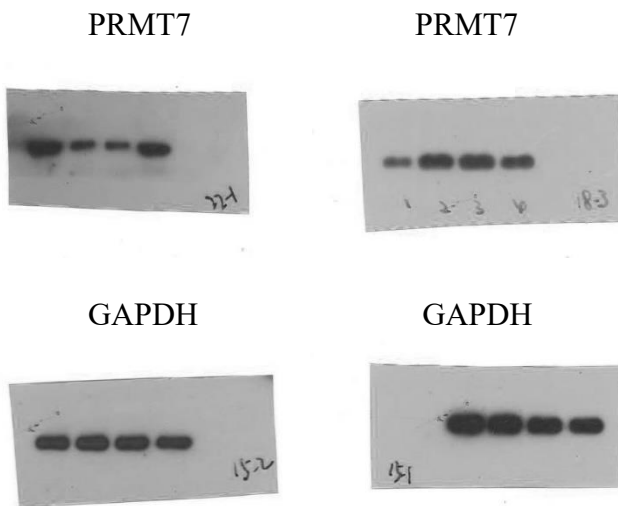

**Figure 7C**

PRMT7

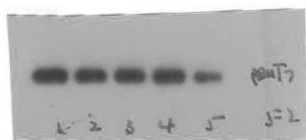

GAPDH

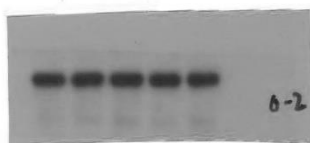

**Figure 8E**

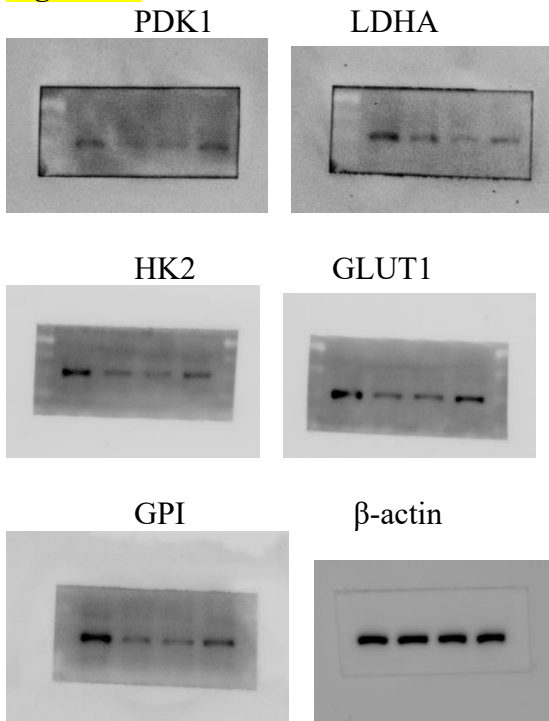

**Figure 8F**

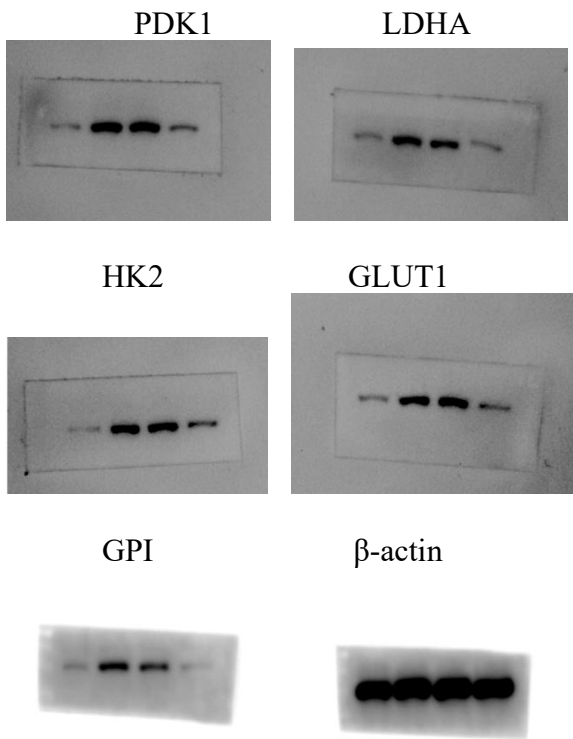

**Figure 8L**

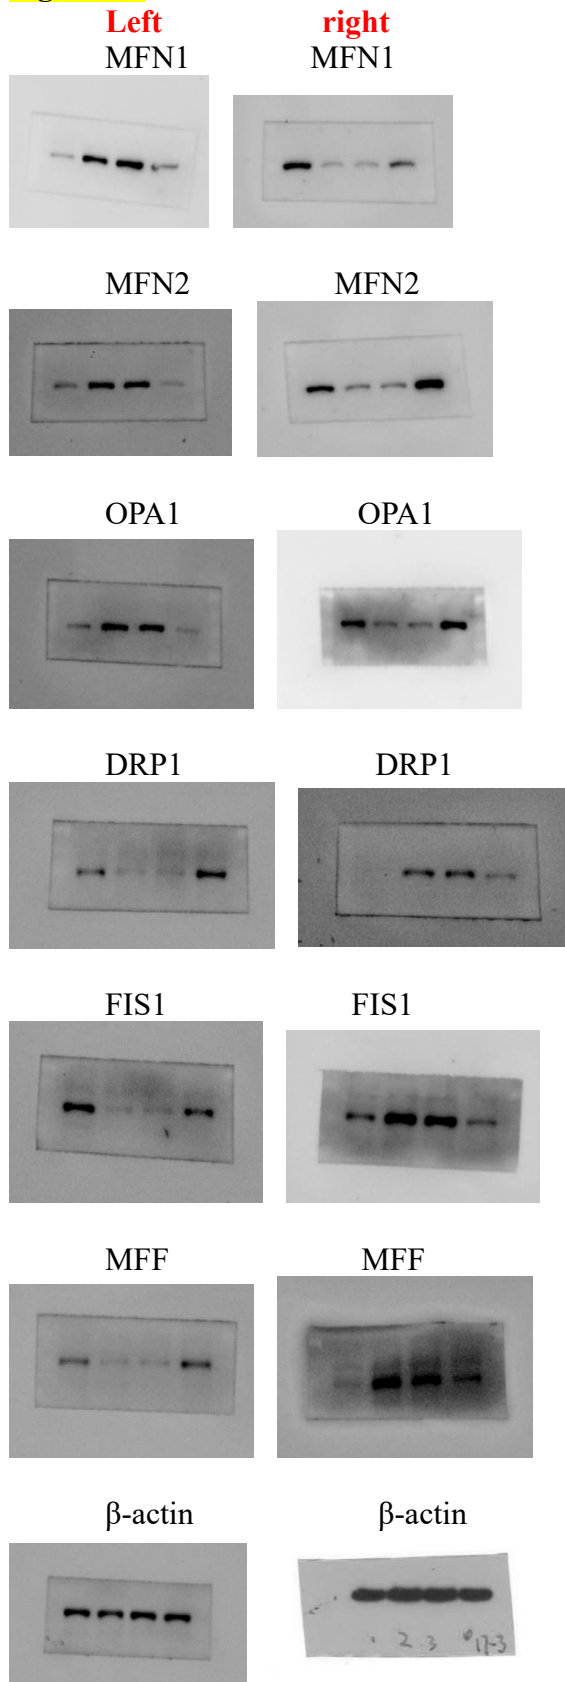

Figure S1F

**TPC-1**  
PDK1

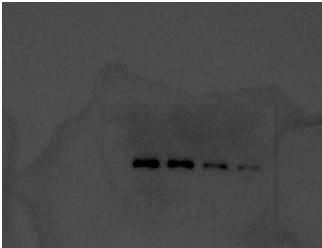

**K1**  
PDK1

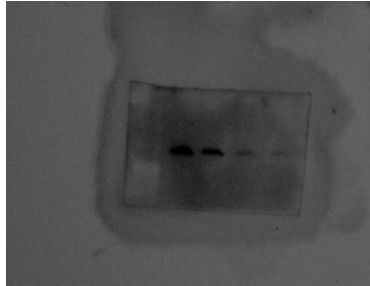

LDHA

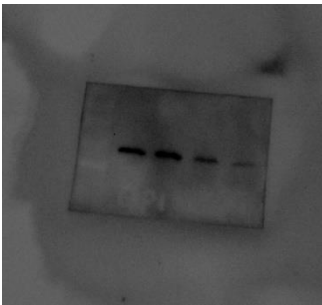

LDHA

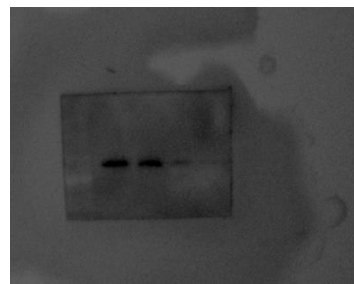

HK2

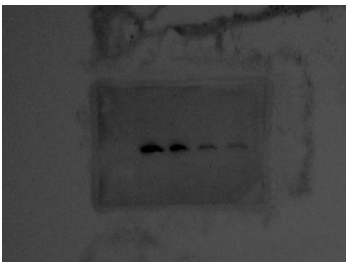

HK2

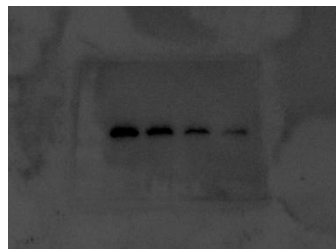

GLUT1

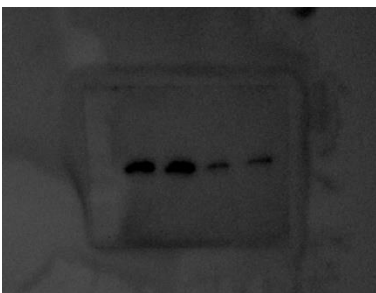

GLUT1

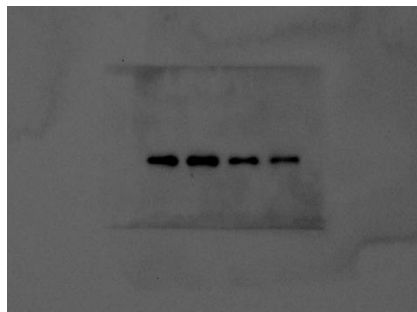

GPI

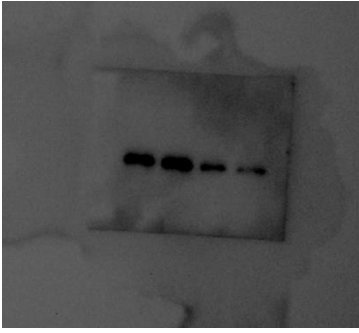

GPI

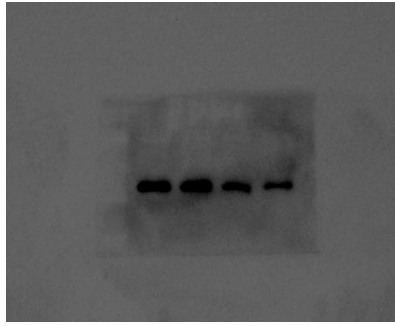

$\beta$ -actin

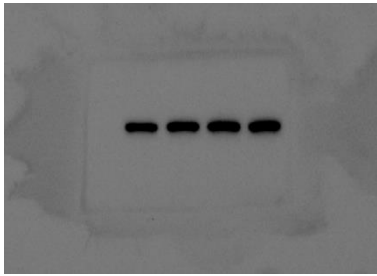

$\beta$ -actin

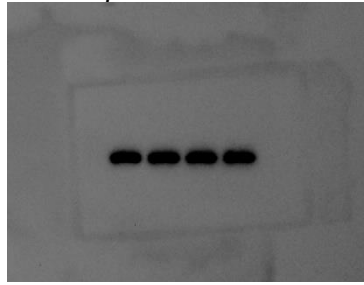

**Figure S5C**

IGF2BP1

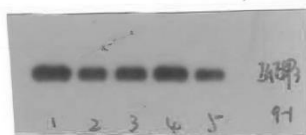

GAPDH

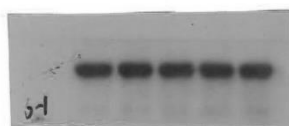

**Figure S7A**

**Left**

PRMT7

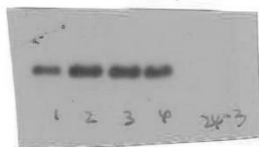

GAPDH

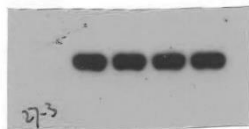

**Right**

PRMT7

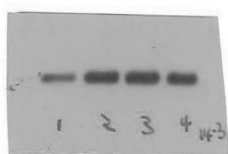

GAPDH

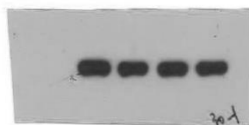

**Figure S8A**

**TPC-1**

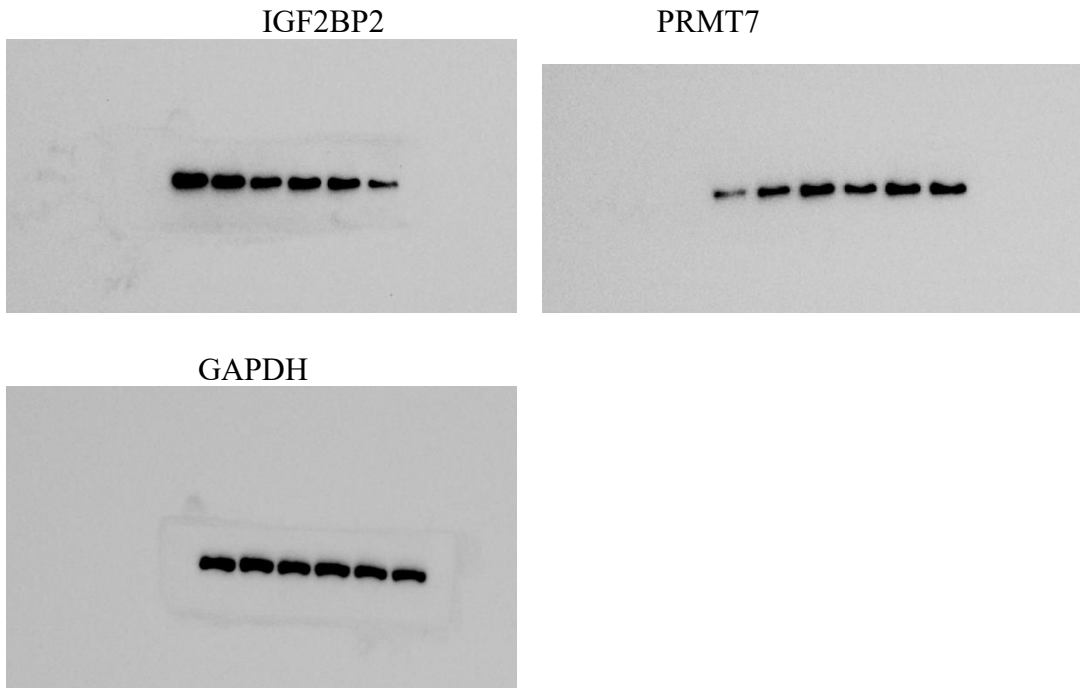

**Figure S8B**

**K1**

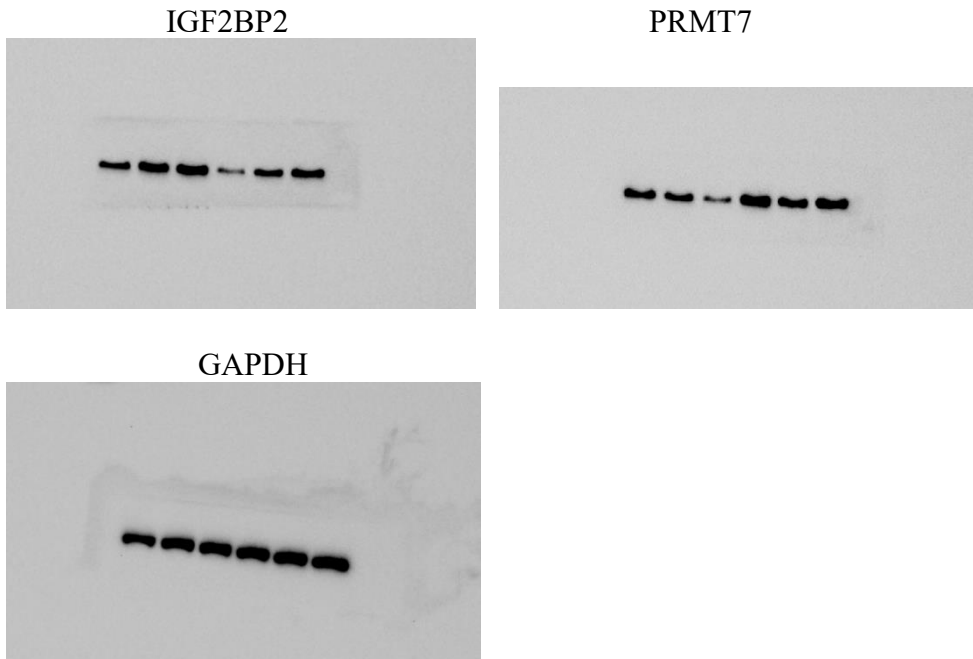

**Figure S8C**

**TPC-1**

IGF2BP3

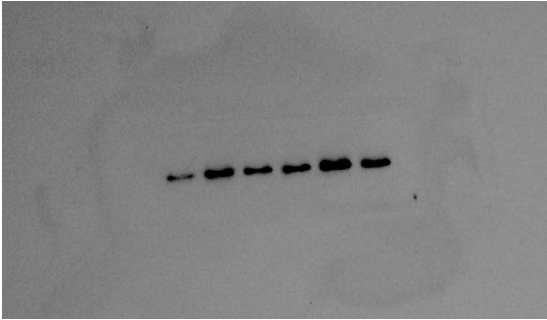

PRMT7

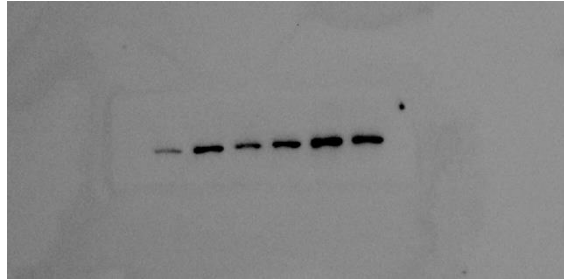

GAPDH

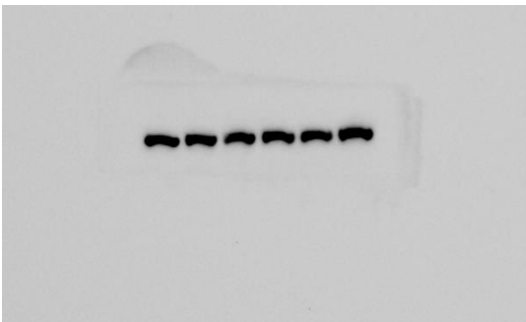

**Figure S8D**

**K1**

IGF2BP3

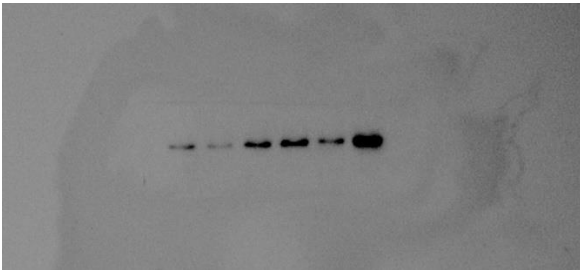

PRMT7

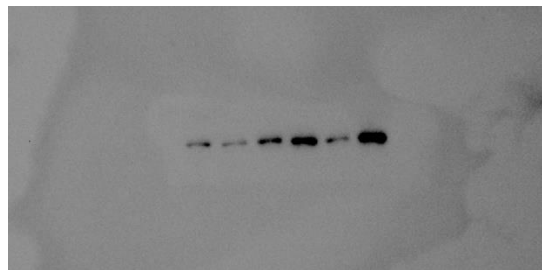

GAPDH

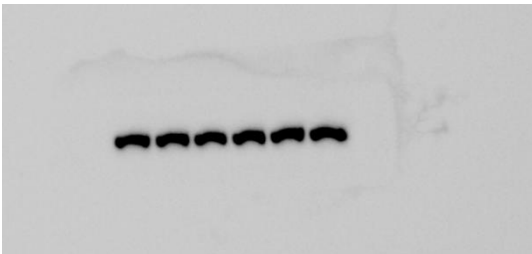

Supplement: MOESM11 [file 41419_2023_6348_MOESM11_ESM.pdf]
